# Supplementary material for: Efficacy and Safety of Pancreas-Targeted Hydrodynamic Gene Delivery in Rats
Source: PubMed Central journal article supplement — Mol Ther Nucleic Acids. 2017 Aug 18;9:80–8. doi: 10.1016/j.omtn.2017.08.009 (PMC5612811; doi:10.1016/j.omtn.2017.08.009), 2017-08-18

**OMTN, Volume 9**

## **Supplemental Information**

### **Efficacy and Safety of Pancreas-Targeted**

### **Hydrodynamic Gene Delivery in Rats**

**Kohei Ogawa, Kenya Kamimura, Yuji Kobayashi, Hiroyuki Abe, Takeshi Yokoo, Norihiro Sakai, Takuro Nagoya, Akira Sakamaki, Satoshi Abe, Kazunao Hayashi, Satoshi Ikarashi, Junji Kohisa, Masanori Tsuchida, Yutaka Aoyagi, Guisheng Zhang, Dexi Liu, and Shuji Terai**

**Supplementary Figure S1. Effect of pancreas-targeted HGD on the small intestine.**

Immunohistochemical staining with an antiluciferase antibody was performed on tissue of small intestine collected 4 h after systemic HGD (**a, b**) or pancreas-targeted HGD (**c, d**). The scale bar represents 100  $\mu\text{m}$ . Black arrowhead indicates the positively stained cells.

**Supplementary Figure S2. Impact of DNA on serum concentrations of amylase.**

The serum biochemical analysis was performed with sera collected 4 h after the pancreas-targeted HGD of 2% BW saline with or without plasmid DNA. The concentrations of serum amylase represent mean  $\pm$  SD (n = 5). N.S., no statistical significance by t-test.

**Materials and Methods for Supplementary Data**

Tissue samples for immunohistochemical staining were collected from the small intestine 4 h after the HGD of pCMV-Luc plasmid, fixed in 10% formalin upon tissue collection and embedded in paraffin. A standard immunohistochemistry was performed using goat anti-Luciferase polyclonal antibody (G7451, 1:100 dilution; Promega Inc., Madison, WI, USA), Vecstain Elite ABC Goat IgG kit (PK-6105; Vector Laboratories

Inc., Burlingame, CA, USA), and DAB chromogen tablet (Muto Pure Chemicals Co. Ltd, Bunkyo-ku, Tokyo, Japan). Blood samples were collected from each rat 4 h from tail vein or IVC. The serum biochemical analysis was performed by BML Inc. (Shibuya-ku, Tokyo, Japan).

# Supplementary Figure 1

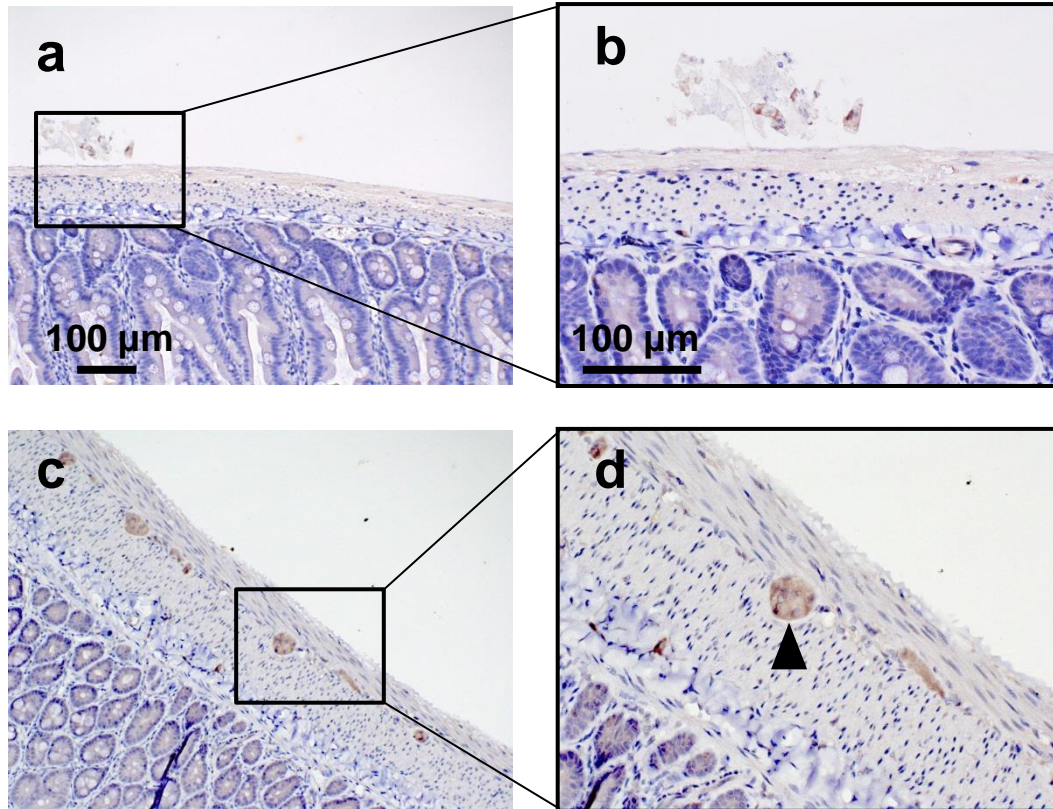

# Supplementary Figure 2

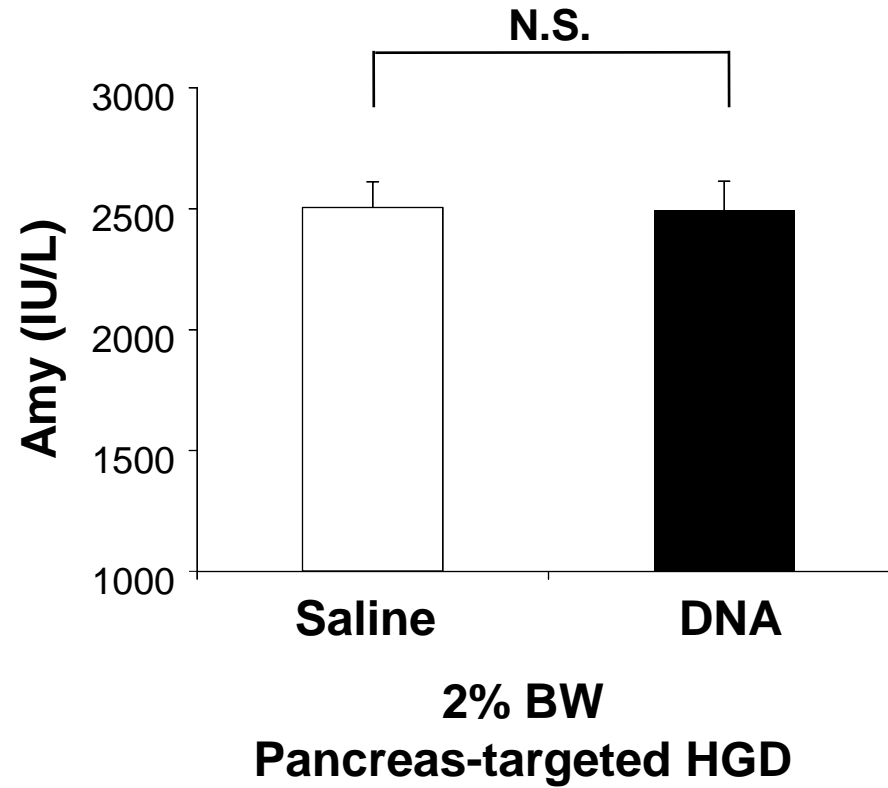

Supplement: mmc1.pdf [file mmc1.pdf]
